# Supplementary material for: Acute Toxicity Study of Bioactive Galactomannans From Two Non-Traditional Leguminosae Sources
Source: Research Square preprint supplement (doi:10.21203/rs.3.rs-514492/v1), 2021-05-27
Supplement: Supplementary file 1 [file c4c57a9de7522a3746d5c766.xlsx]

## Sheet: Figure 1
Figure 1A	Crossing
	Control			GM-CP			GM-DR
60 min	51	54	15	32	40	47	29	50	21
7d	35	43	20	45	29	35	27	38	26
14d	15	34	13	4	37	34	28	20	17
Figure 1B	Rearing
	Control			GM-CP			GM-DR
60 min	27	22	8	13	13	17	10	31	12
7d	20	15	6	23	13	7	5	23	29
14d	6	11	6	0	2	4	15	5	14
Figure 1C	Grooming
	Control			GM-CP			GM-DR
60 min	3	4	3	2	4	4	1	2	6
7d	2	2	4	2	4	4	1	1	3
14d	3	4	6	4	3	4	4	1	3

## Sheet: Figure 3
Figure 3A	GM-CP	Mechanical threshold (g)
	Vehicle					Unpurified					Purified
0	34.3	48.2	66.9	79.1	33.5	43.4	47.5	6.8	68.4	75.2	52	70.4	67.36	82.16	75.63
3	52.8	25.4	59.6	44.4	55.6	10.8	13.7	19.5	28	21.1	43.06	36.09	26.03	52.76	31.96
6	37.2	46.8	42.9	45.6	25.7	16.6	16.7	19	43	28.6	60.43	14.8	29.73	35.6	47.16
Figure 3B	GM-DR	Mechanical threshold (g)
	Vehicle					Unpurified					Purified
0	34.3	48.2	66.9	79.1	33.5	52.7	59.6	10.2	42.9	58.1	50.53	50.9	65.03	56.76	84.46
3	52.8	25.4	59.6	44.4	55.6	26	7.2	12.4	6.1	23.6	37.3	50.76	77.33	19.36	51.83
6	37.2	46.8	42.9	45.6	25.7	24.8	15.3	30.3	18.1	16.7	29.06	94.3	54.2	14.53	55.8
Figure 3C	GM-CP	Cells / mm3
	Control					Unpurified					Purified
Figure 3C	GM-CP	Leukocyte influx		cell
	75	262	81	81	256	5200	4600	25600	8500	11400	122	47	11	41	58
Figure 3D	GM-DR	Cells / mm3
	Control					Unpurified					Purified
	75	262	81	81	256	33400	29600	5200	21800	28400	425	22	88	49	22

## Sheet: Table 1
Table 1	Body weight (g)
	Control			GM-CP			GM-DR
60 min	180	190	175	178	179	188	176	198	179
day 7	181	189	179	183	175	189	177	200	180
day 14	182	200	178	183	178	195	177	200	180

## Sheet: Table 3
Table 3	Organs weight (g)
	Control			GM-CP			GM-DR
Brain	1.91	1.91	1.7	1.99	1.91	1.89	1.76	0.68	2.15
Heart	0.84	0.61	0.76	0.74	0.67	0.67	0.73	0.78	0.68
Kidneys	1.39	1.33	1.57	1.47	1.43	1.27	1.33	1.44	1.34
Liver	6.5	6.89	6.22	6.29	6.24	6.3	6.54	6.24	5.26
Lungs	1.47	1.5	2.05	1.42	1.39	1.46	1.32	1.64	1.71
Spleen	0.67	0.53	0.47	0.48	0.47	0.57	0.59	0.58	0.44

## Sheet: Table 4
Table 4	Serum parameters
		Control			GM-CP			GM-DR
Alkaline phosphatase	U L-1	163	61	163	123	87	72	97	137	107
ALT	U L-1	91	102	91	70	78	74	60	100	63
AST	U L-1	25	34	25	35	36	33	30	33	36
Albumin	mg dL-1	4.19	5.22	4.19	5.23	5.43	5.12	5.02	5.63	5.58
Bilirubin	mg dL-1	0.10	0.00	0.10	0.02	0.09	0.00	0.01	0.04	0.01
Creatinine	mg dL-1	0.64	0.70	0.64	0.63	0.70	0.59	0.52	0.58	0.63
Glucose	mg dL-1	129	129	170	156	175	187	212	184	197
Proteins	mg dL-1	10.83	10.83	10.84	11.38	11.67	11.06	10.93	12.11	11.47
Total cholesterol	mg dL-1	58	70	58	80	58	65	50	81	74
Tryglicerides	mg dL-1	128	131	126	93	121	142	141	133	138
Urea	mg dL-1	77	77	71	84	78	72	64	72	72

## Sheet: Table 5
Table 5	Hematology
Parameter	Unit	Control			GM-CP			GM-DR
Red Blood Cells	106 µL-1	8.34	8.2	8.68	8.09	8.42	8.21	8.13	8.36	7.8
Hemoglobin	g dL-1	14.4	13.4	14.1	14	13.9	13.6	14	13.8	13.7
Hematocrit	%	50.33	49	49.81	48.08	49.17	47.89	41.75	47.53	46.53
MCV	fL	60	60	59	59	58	58	60	57	60
MCH	(pg)	17.2	16.3	16.2	17.3	16.5	16.5	17.2	16.5	17.6
MCHC	g dL-1	28.5	27.3	28.2	29	28.3	28.3	33.5	29	29.4
RBC distribution	%	13.6	14	14.4	13.8	14.2	14	13	14.8	13.2
Platelets	103 µL-1	1935	1778	1638	1993	1910	1732	1836	1488	1651
Platelet Mean Volume	fL	7.3	7	7.4	7.6	7.6	7.2	7.1	7.4	7
Platelet distribution	%	36	35.3	36.9	36.4	36.6	36.3	36.3	38	33.8
Leukocytes (total count)	103 µL-1	8.45	9.77	13.01	12.09	6.41	9.58	8.39	7.93	8.96
Granulocytes	103 µL-1	1.34	2.03	2.66	2.55	0.79	1.63	0.81	0.72	0.88
Lymphocytes	103 µL-1	6.31	7.09	9.77	8.16	5.64	7.13	6.94	6.35	7.5
Monocytes, basophiles and eosinophiles	103 µL-1	0.76	0.65	0.58	0.58	0.48	0.82	0.64	0.86	0.58

## Sheet: Table 6
Table 6	Dermal toxicity
Hyperemia
	Control			GM-CP			GM-DR
24 h	2	0	0	0	0	1	1	2	1
day 7	0	0	1	1	2	1	1	1	0
day 14	0	1	0	0	0	1	0	0	0
Edema
	Control			GM-CP			GM-DR
24 h	2	0	0	1	0	1	0	1	0
day 7	0	0	0	0	0	0	0	1	1
day 14	0	0	0	0	0	0	0	0	0
